# Supplementary material
Source: PubMed Central journal article supplement (PMC8325331)
Supplement: pnas.2108859118.sapp.pdf [file pnas.2108859118.sapp.pdf]

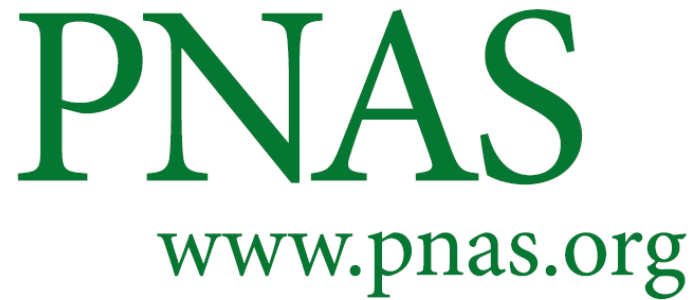

## **Supplementary Information for Structures and implications of TBP-nucleosome complexes**

Haibo Wang<sup>a</sup>, Le Xiong<sup>a</sup> Patrick Cramer<sup>a,\*</sup>

<sup>a</sup>Max Planck Institute for Biophysical Chemistry, Department of Molecular Biology, Am Fassberg 11, 37077 Göttingen, Germany.

\*Corresponding author.

**Email:** [patrick.cramer@mpibpc.mpg.de](mailto:patrick.cramer@mpibpc.mpg.de)

### **This PDF file includes:**

Figures S1 to S8  
Tables S1 to S2  
Legend for Movie S1  
SI References

### **Other supplementary materials for this manuscript include the following:**

Movie S1

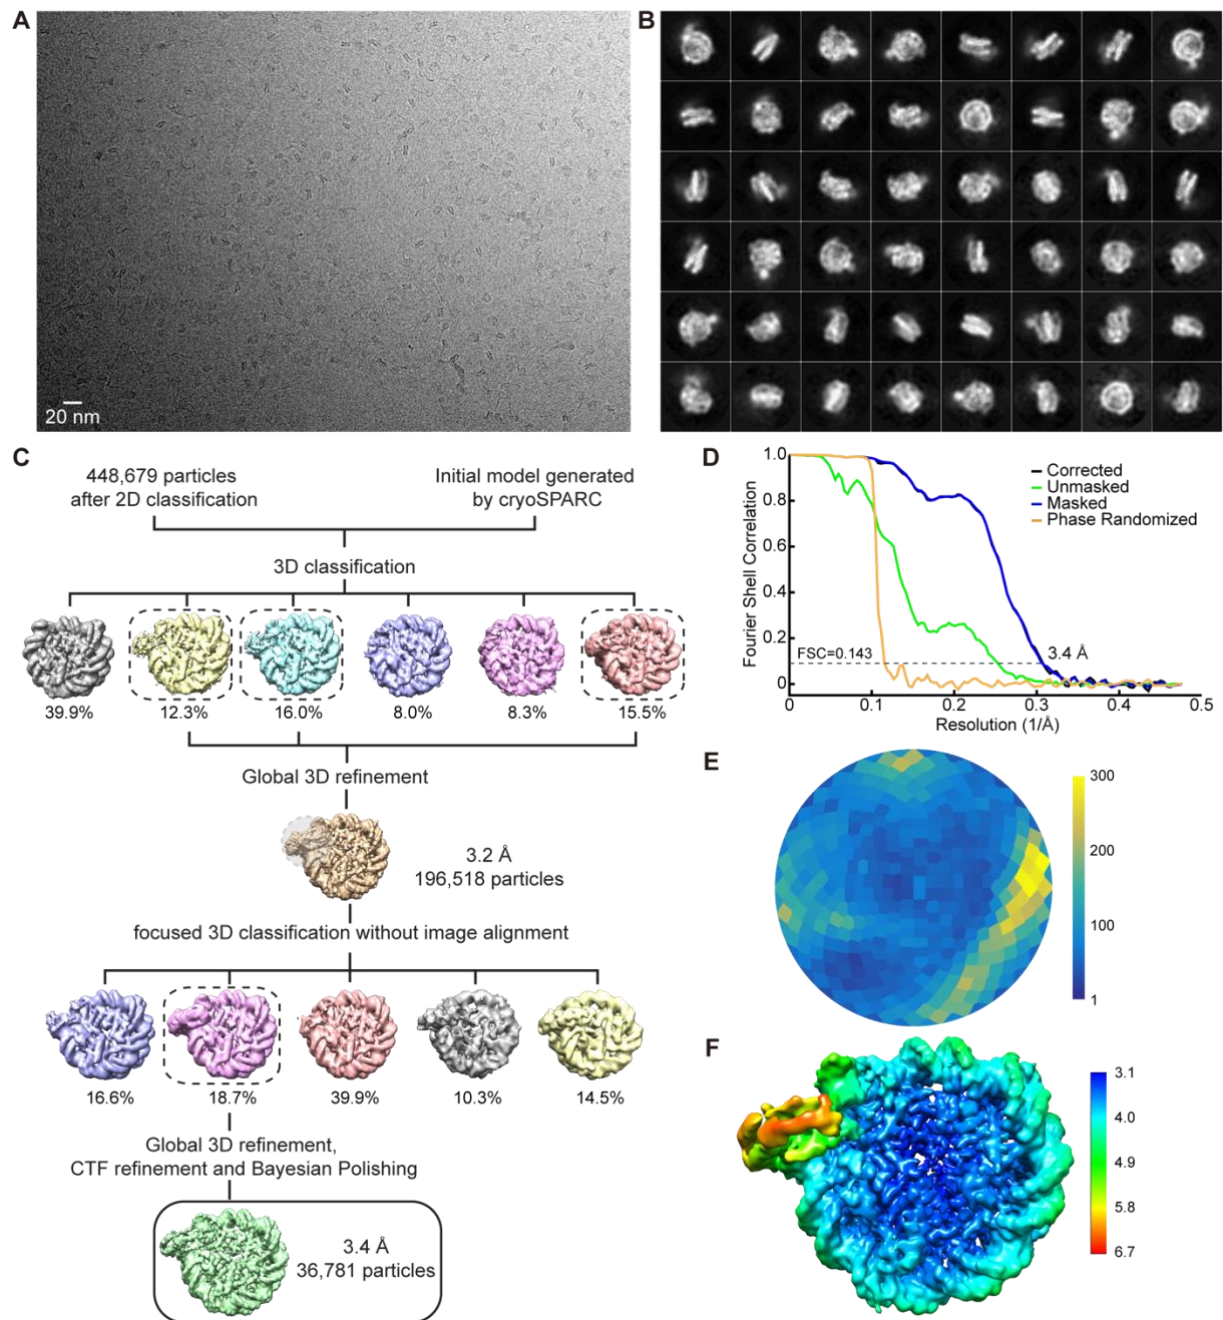

**Fig. S1.** Cryo-EM structure determination of TBP-NCP complex. (A) Exemplary cryo-EM micrograph. (B) Representative 2D class averages. (C) Sorting and classification tree. (D) Fourier shell correlation (FSC) between half maps of the final reconstructions. Resolutions for the gold-standard FSC 0.143 criterion are listed. (E) Angular distribution plot for particles in the final reconstruction. Color shading from blue to yellow provides the number of particles at a specific orientation as indicated. (F) Surface representation of the structure colored according to local resolution (Å).

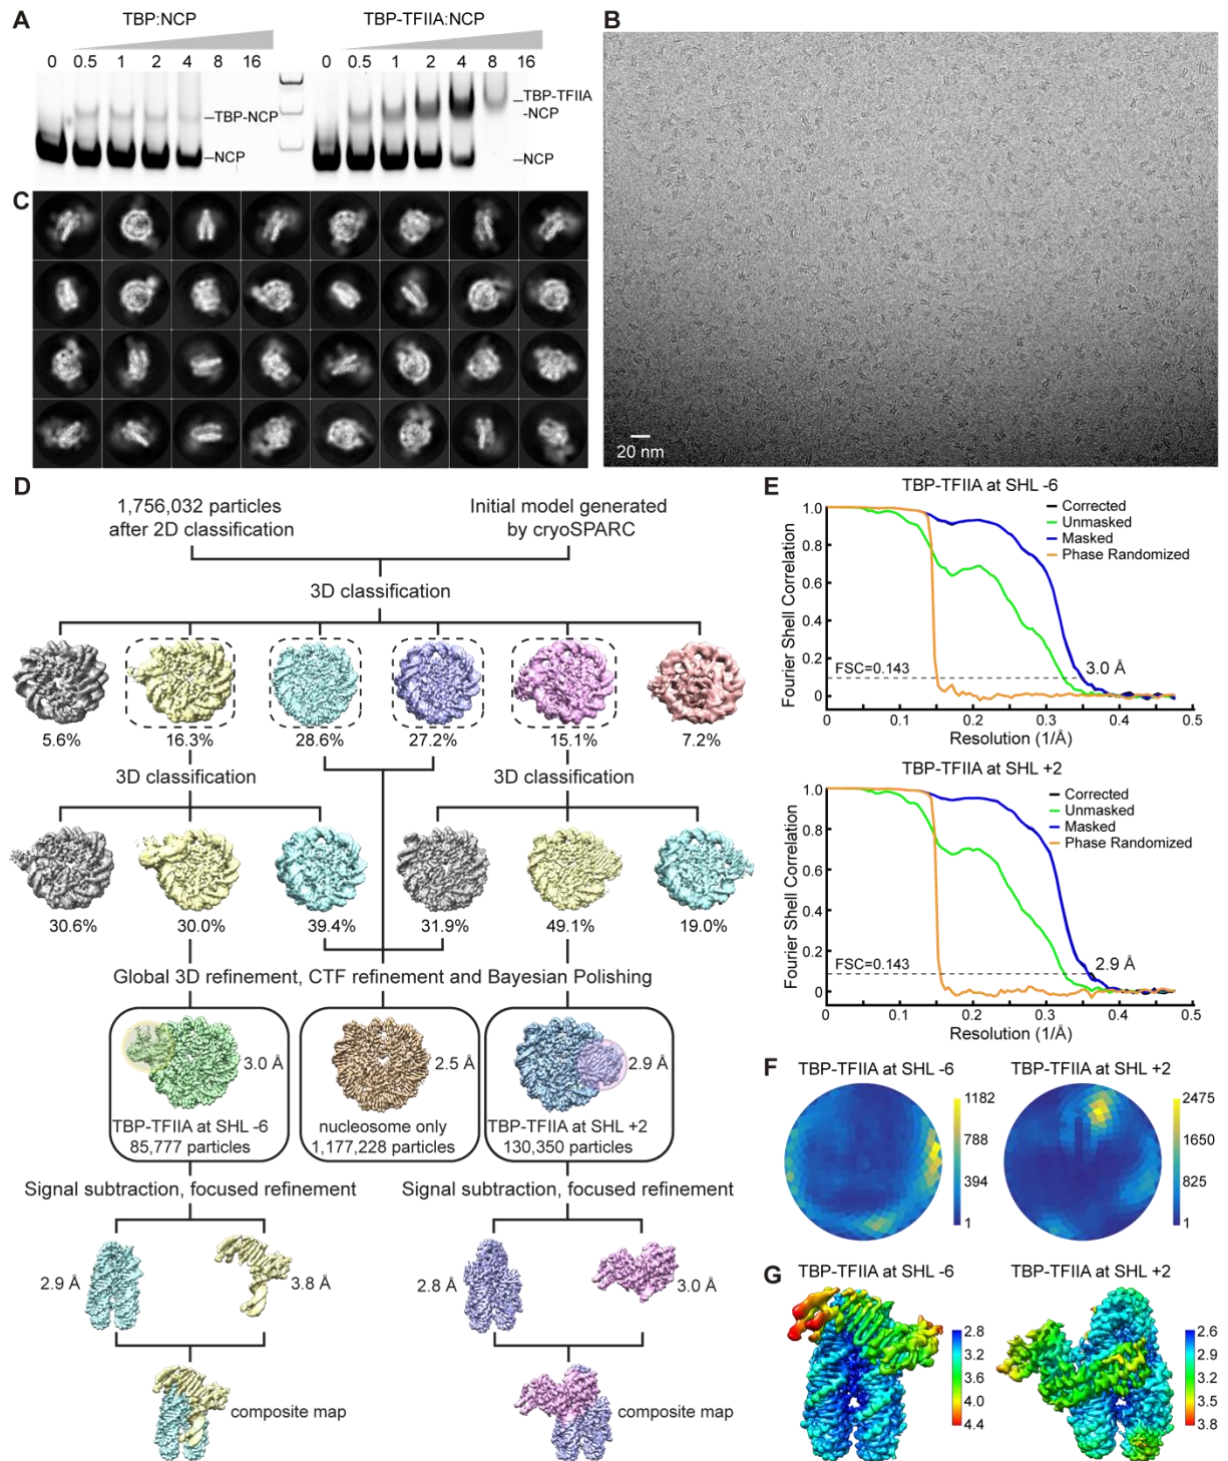

**Fig. S2.** Sample preparation and cryo-EM structure determination of TBP-TFIIA-NCP complex. (A) Electrophoretic mobility shift assay (EMSA) shows that TFIIA stabilizes TBP binding to the nucleosome. Molar ratios of TBP to NCP or TBP/TFIIA to NCP are shown on the top of each lane. Bands are labeled on the right. (B) Exemplary cryo-EM micrograph. (C) Representative 2D class averages. (D) Sorting and classification tree. (E) Fourier shell correlation (FSC) between half maps of the final reconstruction. Resolutions for the gold-standard FSC 0.143 criterion are listed. (F) Angular distribution plot for all particles in the final reconstruction. Color shading from blue to yellow provides the number of particles at a specific orientation. (G) Surface representation colored according to local resolution (Å).

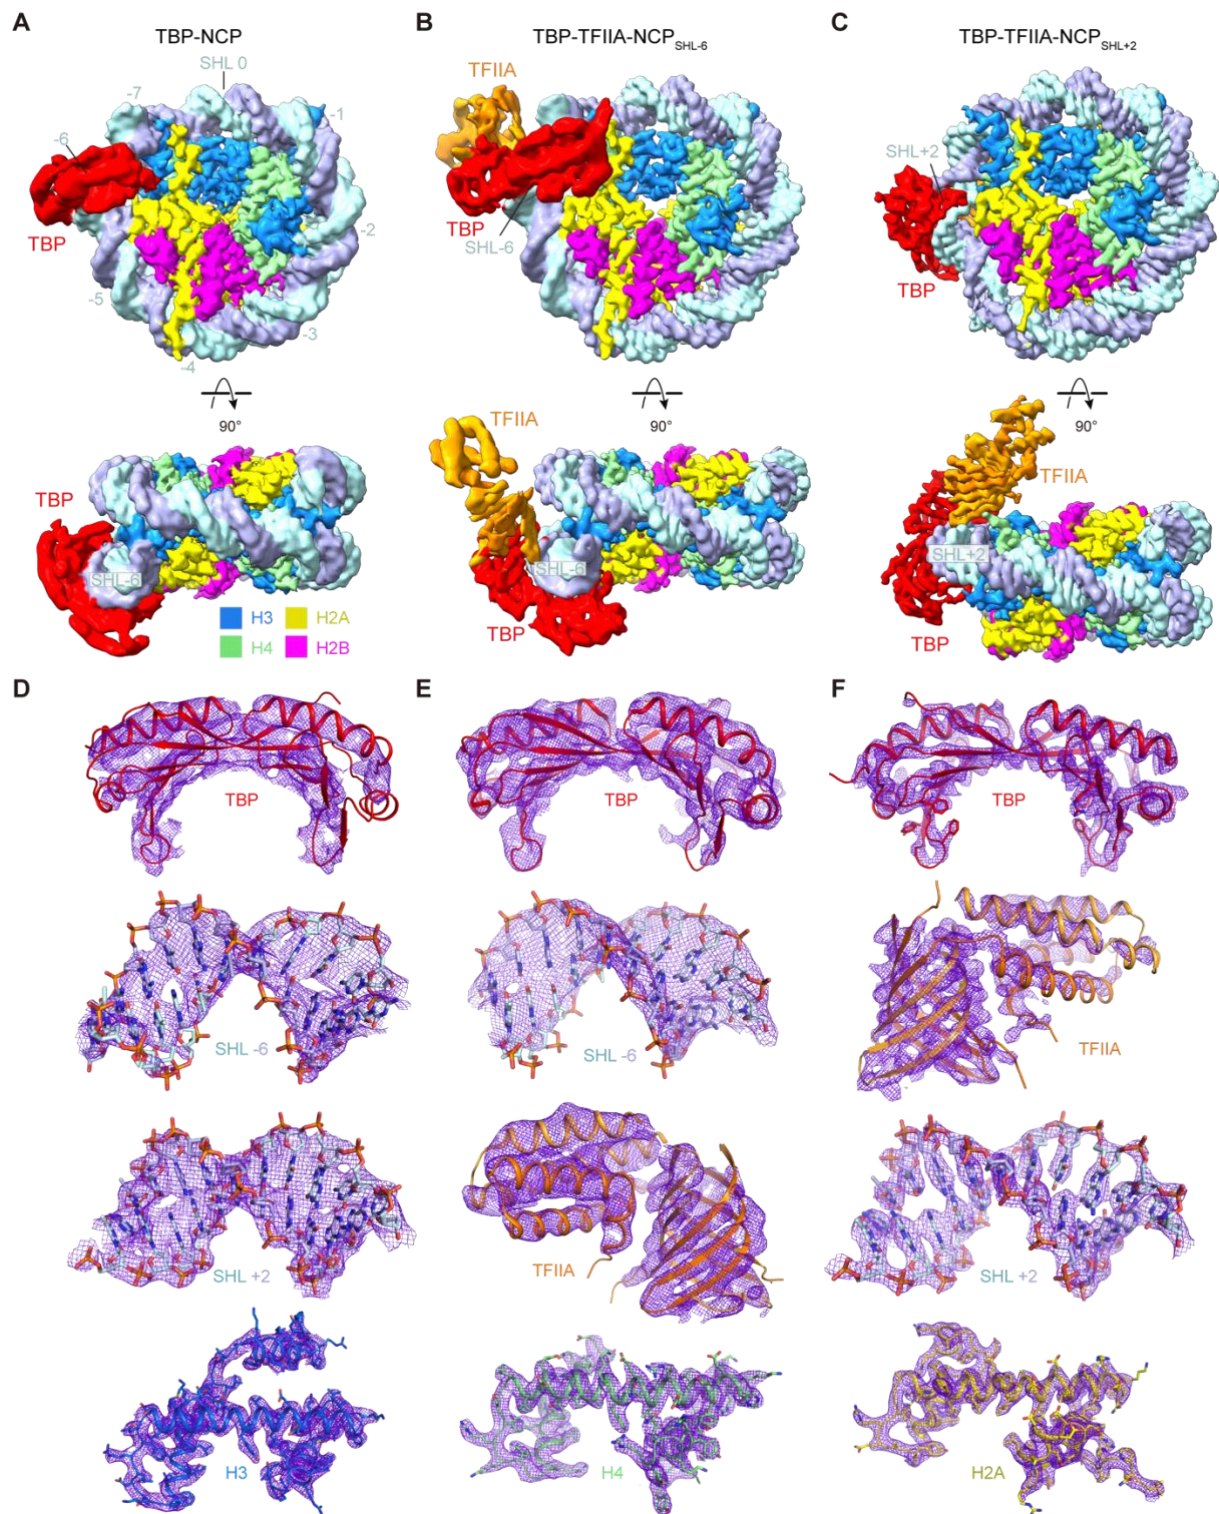

**Fig. S3.** Quality of the cryo-EM densities. (A-C) Overall cryo-EM maps of the structures TBP-NCP, TBP-TFIIA-NCP<sub>SHL-6</sub> and TBP-TFIIA-NCP<sub>SHL+2</sub>, respectively. (D-F) Local map densities (purple meshes) for various regions as indicated for TBP-NCP (D), TBP-TFIIA-NCP<sub>SHL-6</sub> (E), and TBP-TFIIA-NCP<sub>SHL+2</sub> (F).

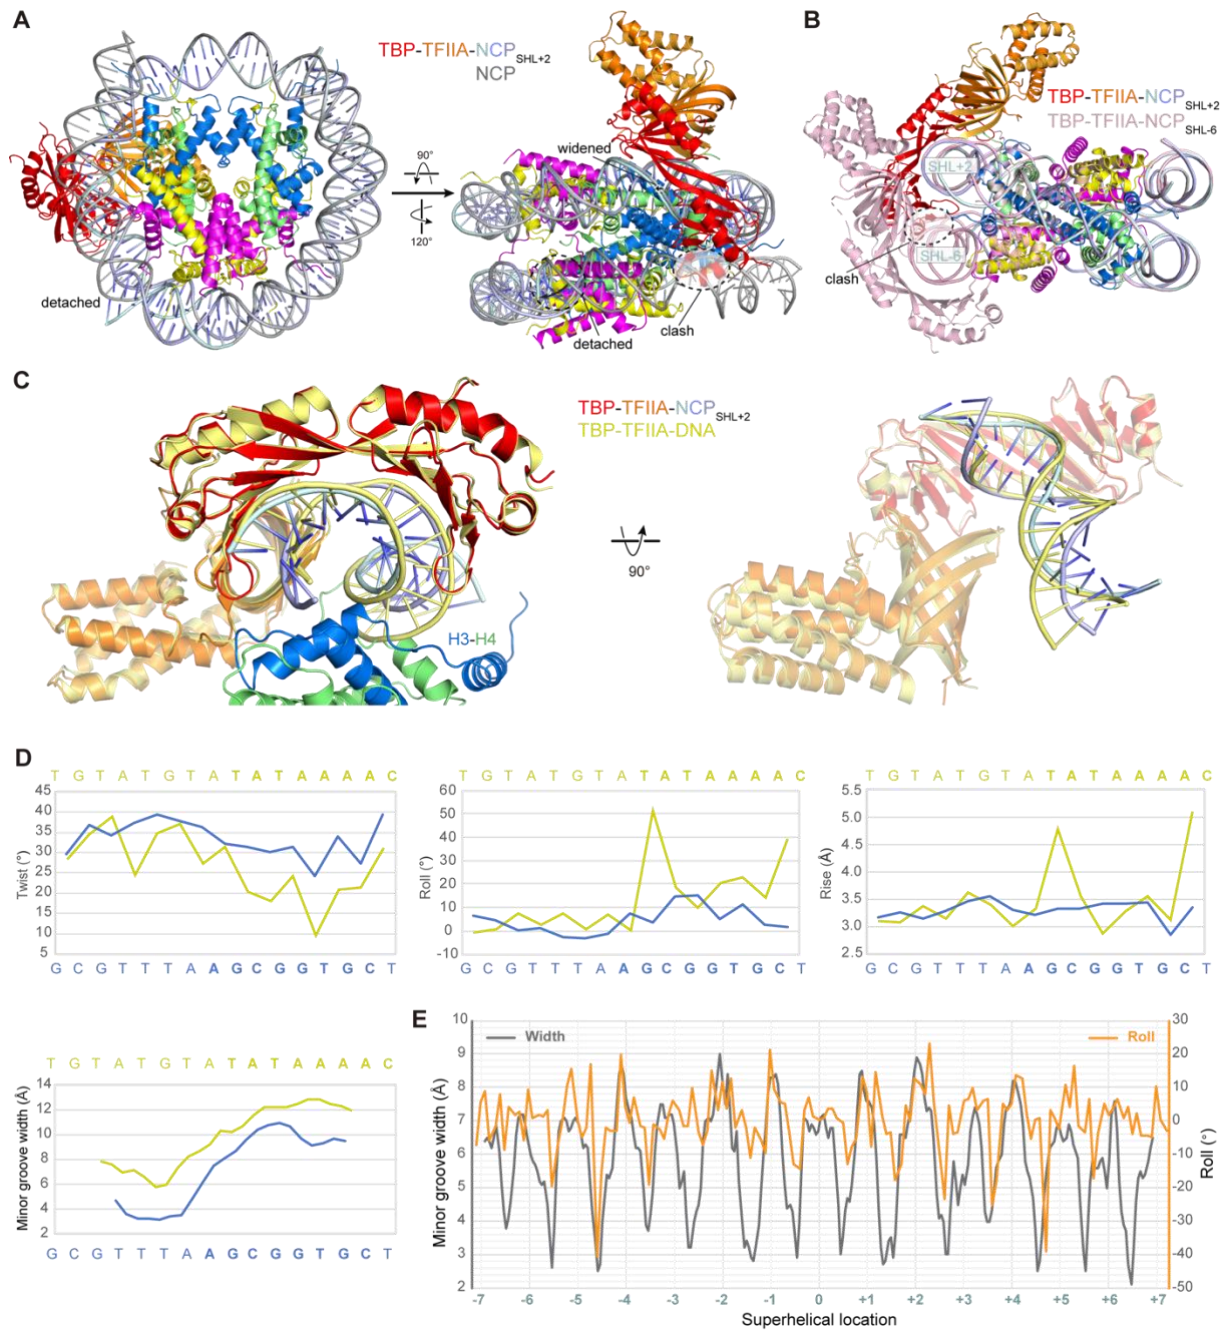

**Fig. S4.** DNA conformation in TBP-TFIIA-NCP<sub>SHL+2</sub> structure. (A) Comparison with unbound NCP structure after superposition of histones. (B) Comparison with TBP-TFIIA-NCP<sub>SHL-6</sub> structure are superposition of histones. (C) Comparison with TBP-TFIIA-DNA structure (PDB code: 1YTF) (1) after superposition of TBP proteins shows the difference of underlying DNA in inclinations of base pairs. (D) Comparison of the DNA base-pair-step parameters and minor groove width in TBP-TFIIA-NCP<sub>SHL+2</sub> (blue) and TBP-TFIIA-DNA (yellow). The base-pair-step parameters twist, roll and rise, and the minor groove width of DNA were calculated using CURVES+ (2). DNA nucleotides covered by TBP are in boldface. (E) Plot of minor groove widths (grey) and roll angles (orange) in the unbound Widom 601 NCP structure.

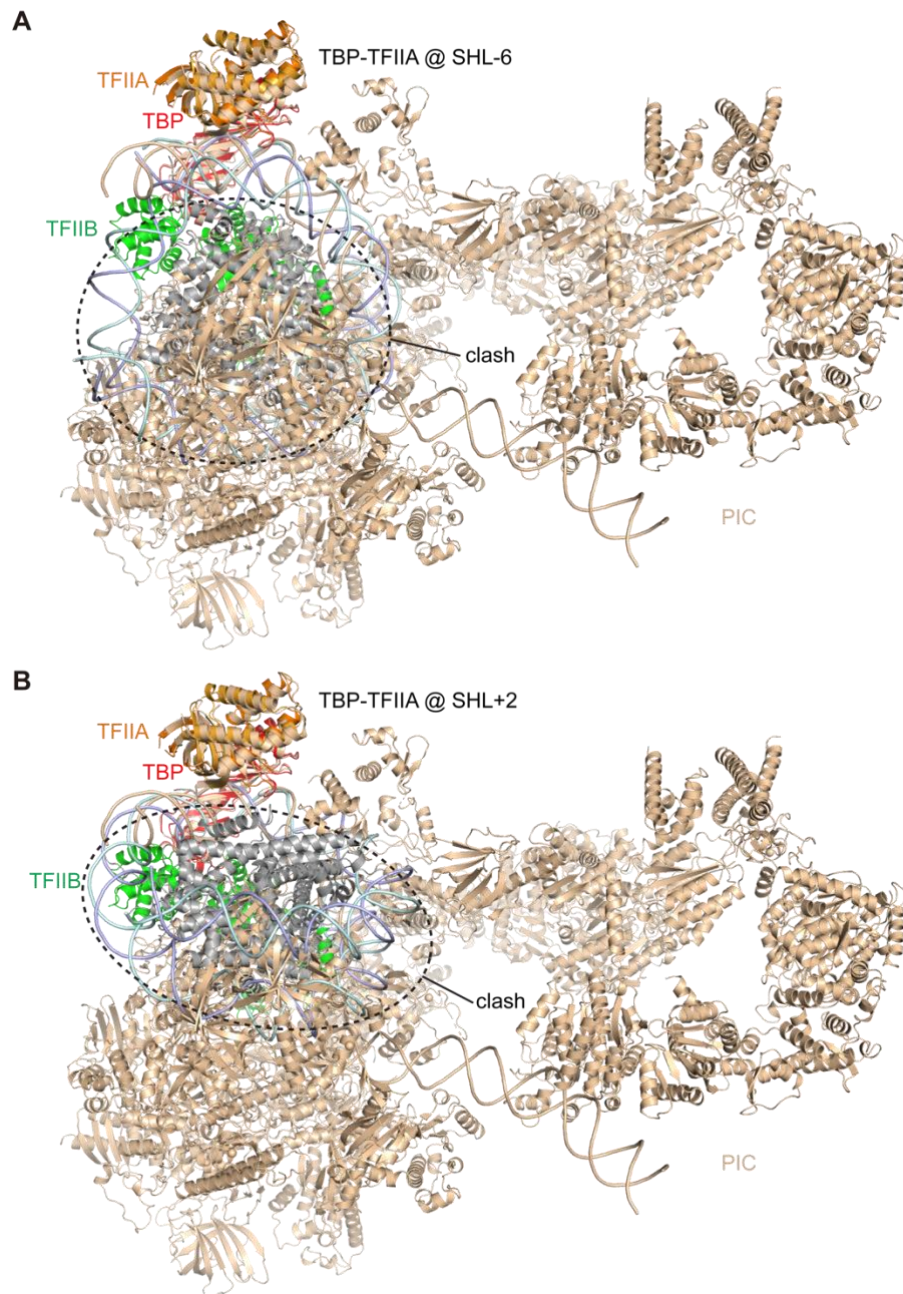

**Fig. S5.** Nucleosome-bound TBP is incompatible with PIC assembly. (A) Comparison of the TBP-TFIIA-NCP<sub>SHL-6</sub> structure with the PIC structure (PDB code: 5OQJ) (3) after superposition of TBP. (B) Comparison of the TBP-TFIIA-NCP<sub>SHL+2</sub> structure with the PIC structure after superposition of TBP. Histones are in grey whereas PIC components are in wheat except for TFIIIB, which is in green.

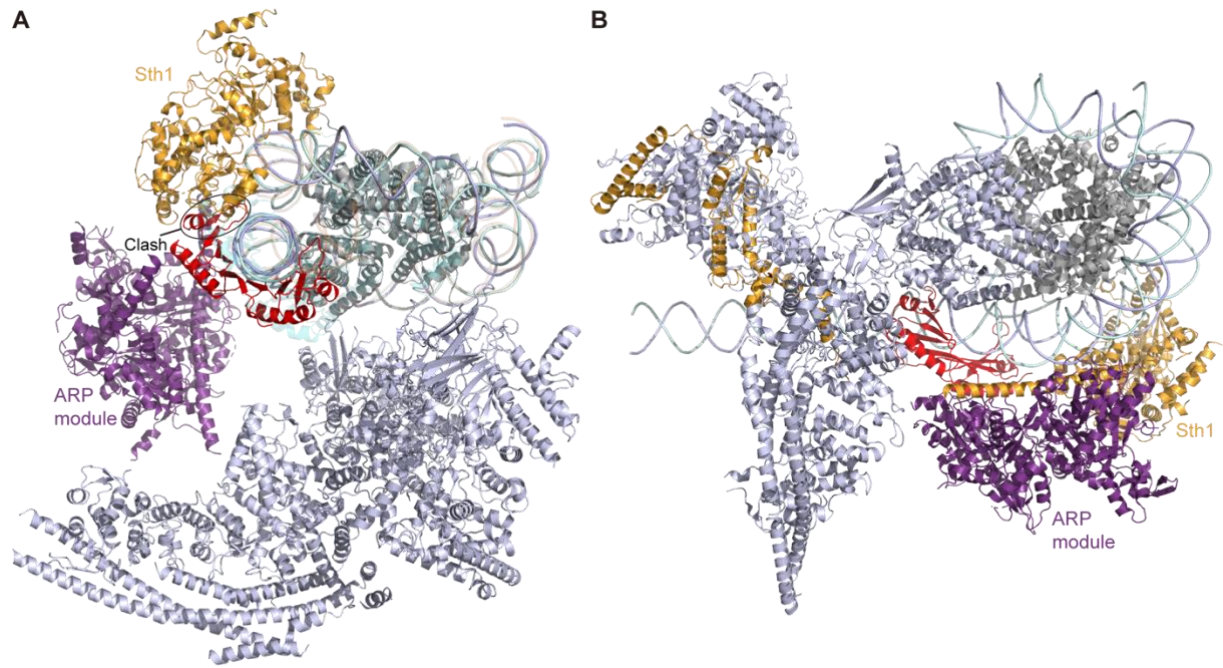

**Fig. S6.** TBP may be accommodated during chromatin remodeling by RSC. (A) Modeling TBP (red) at SHL -6 of a RSC-nucleosome structure (PDB 6KW3) (4) clashes with ATPase motor module (gold), as indicated with a black circle. (B) Modeling TBP (red) at SHL -7 of a RSC-nucleosome structure containing longer upstream DNA (PDB 6TDA) (5) does not result in clashes between TBP and RSC.

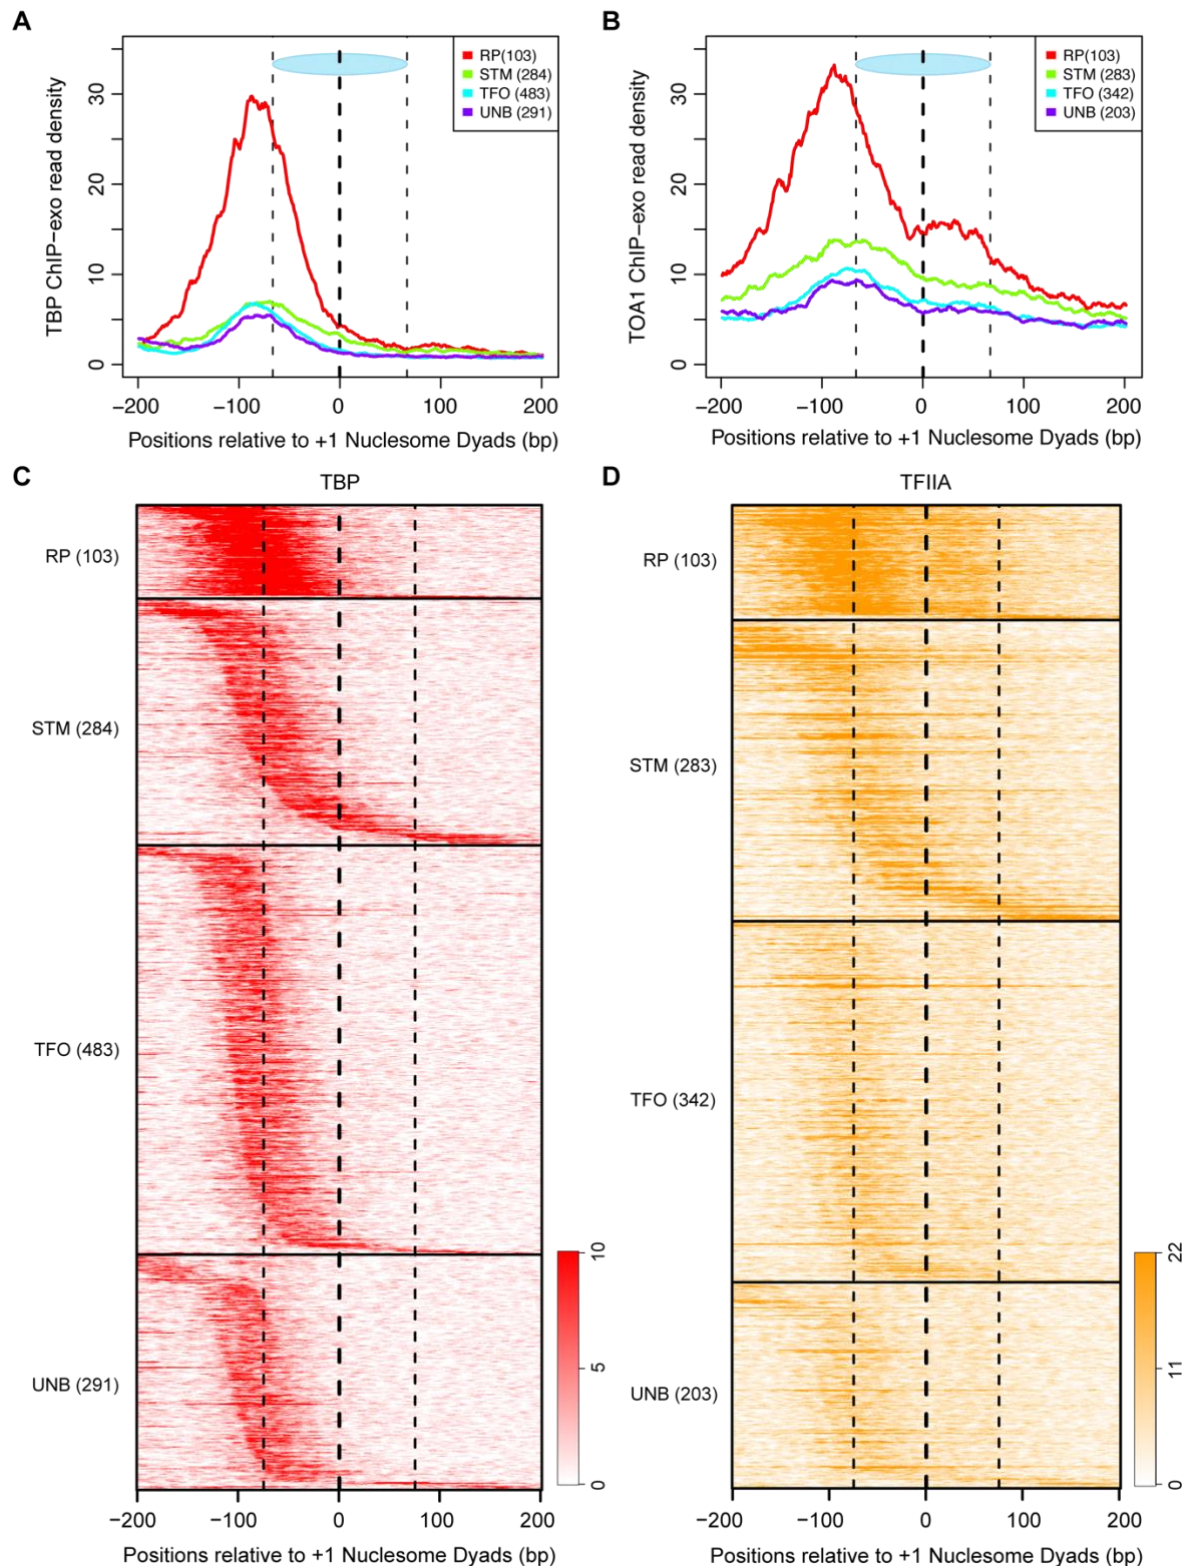

**Fig. S7.** Distribution of TBP and TFIIA ChIP-exo genome-wide occupancy (6) with respect to the location of the +1 nucleosome in yeast cells. The blue oval denotes the nucleosome with its boundaries shown as vertical dashed lines. (A-B) Metagenote plots of TBP (panel A) and TFIIA (panel B) occupancy around the +1 nucleosome for four subgroups of genes (6) as follows: RP: genes encoding ribosomal proteins; STM: genes with promoters associated with inducibility, characteristically bound by sequence-specific transcription factors and major cofactor meta-assemblages SAGA, TUP and/or Mediator/SWI-SNF; TFO: genes with promoters that lacked STM cofactors but typically contained the insulator Abf1 or Reb1; UNB: genes with promoters that only showed bound PIC. (C-D) Heatmaps of TBP and TFIIA occupancy



around the +1 nucleosome sorted by the distance between the two for four subgroups of genes as in panels A, B.

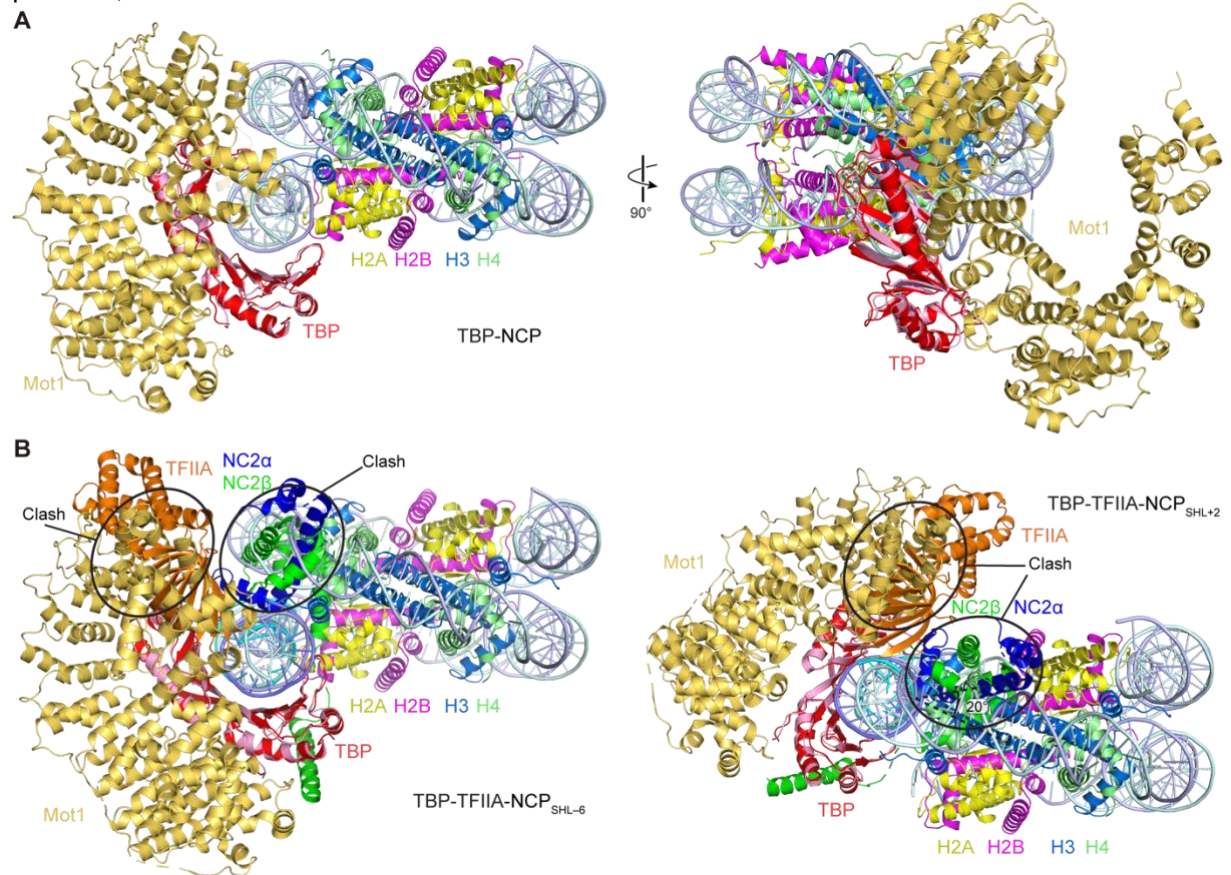

**Fig. S8.** Comparisons with structures of the TBP regulators Mot1 and NC2. (A) Comparison of our TBP-NCP structure with the Mot1-TBP complex structure (PDB 3OC3) (7) after superposition of TBP suggests that N-terminal domain of Mot1 can bind nucleosome-bound TBP. The latch motif of Mot1 is omitted. (B) Comparison of our two TBP-TFIIA-NCP structures with the Mot1-TBP-DNA-NC2 structure (PDB 4WZS) (8) after superposition of TBP. NC2 occupies a position similar to that of the histone dimer H3-H4 in the nucleosome. Clashes are indicated with black circles. Only the N-terminus of Mot1 is present in the structural comparisons.

### Supplementary references

1. S. Tan, Y. Hunziker, D. F. Sargent, T. J. Richmond, Crystal structure of a yeast TFIIA/TBP/DNA complex. *Nature* **381**, 127-151 (1996).
2. C. Blanchet, M. Pasi, K. Zakrzewska, R. Lavery, CURVES+ web server for analyzing and visualizing the helical, backbone and groove parameters of nucleic acid structures. *Nucleic Acids Res* **39**, W68-73 (2011).
3. S. Schilbach *et al.*, Structures of transcription pre-initiation complex with TFIID and Mediator. *Nature* **551**, 204-209 (2017).
4. Y. Ye *et al.*, Structure of the RSC complex bound to the nucleosome. *Science* **366**, 838-843 (2019).
5. F. R. Wagner *et al.*, Structure of SWI/SNF chromatin remodeller RSC bound to a nucleosome. *Nature* **579**, 448-451 (2020).
6. M. J. Rossi *et al.*, A high-resolution protein architecture of the budding yeast genome. *Nature* **592**, 309-314 (2021).
7. P. Wollmann *et al.*, Structure and mechanism of the Swi2/Snf2 remodeller Mot1 in complex with its substrate TBP. *Nature* **475**, 403-407 (2011).
8. A. Butryn *et al.*, Structural basis for recognition and remodeling of the TBP:DNA:NC2 complex by Mot1. *Elife* **4** (2015).

**Table S1.** Curve fitting parameters for fluorescence anisotropy assay.

Fluorescence anisotropy data found in Fig. 1-2 were fit with a single site binding model. Apparent dissociation constants ( $K_{d,app}$ ),  $B_{max}$  (maximum anisotropy) and  $R^2$  values with error are shown.

| <b>Protein</b> | <b>Substrate</b> | <b><math>K_{d,app}</math> (nM)</b> | <b><math>B_{max}</math></b> | <b><math>R^2</math></b> |
|----------------|------------------|------------------------------------|-----------------------------|-------------------------|
| TBP            | Widom-601 DNA    | $31.1 \pm 8.5$                     | $123.6 \pm 3.3$             | 0.978                   |
| TBP            | Widom-601 NCP    | $134.2 \pm 28.7$                   | $82.9 \pm 3.9$              | 0.962                   |
| TBP+TFIIA      | Widom-601 NCP    | $103.5 \pm 6.3$                    | $113.1 \pm 2.4$             | 0.992                   |

**Table S2.** Cryo-EM Data collection, refinement and validation statistics.

|                                                     | TBP-NCP<br>(EMDB-12899)<br>(PDB 7OHB) | TBP-TFIIA-<br>NCP <sub>SHL-6</sub><br>(EMDB-12897)<br>(PDB 7OH9) | TBP-TFIIA-<br>NCP <sub>SHL+2</sub><br>(EMDB-12898)<br>(PDB 7OHA) | Free NCP<br>(EMDB-12900)<br>(PDB 7OHC) |
|-----------------------------------------------------|---------------------------------------|------------------------------------------------------------------|------------------------------------------------------------------|----------------------------------------|
| <b>Data collection and processing</b>               |                                       |                                                                  |                                                                  |                                        |
| Microscope                                          | FEI Titan Krios                       | FEI Titan Krios                                                  | FEI Titan Krios                                                  | FEI Titan Krios                        |
| Detector                                            | Gatan K3                              | Gatan K3                                                         | Gatan K3                                                         | Gatan K3                               |
| Magnification                                       | 81,000                                | 81,000                                                           | 81,000                                                           | 81,000                                 |
| Voltage (kV)                                        | 300                                   | 300                                                              | 300                                                              | 300                                    |
| Electron exposure (e <sup>-</sup> /Å <sup>2</sup> ) | 41.2                                  | 40.8                                                             | 40.8                                                             | 40.8                                   |
| Defocus range (μm)                                  | 1.5-2.5                               | 1.5-2.5                                                          | 1.5-2.5                                                          | 1.5-2.5                                |
| Pixel size (Å)                                      | 1.05                                  | 1.05                                                             | 1.05                                                             | 1.05                                   |
| Symmetry imposed                                    | C1                                    | C1                                                               | C1                                                               | C1                                     |
| Initial particle images (no.)                       | 448,679                               | 1,756,032                                                        | 1,756,032                                                        | 1,756,032                              |
| Final particle images (no.)                         | 36,781                                | 85,777                                                           | 130,350                                                          | 1,177,228                              |
| Map resolution (Å)                                  | 3.4                                   | 3.0                                                              | 2.9                                                              | 2.5                                    |
| FSC threshold                                       | 0.143                                 | 0.143                                                            | 0.143                                                            | 0.143                                  |
| Map resolution range (Å)                            | 3.1-6.7                               | 2.8-4.4                                                          | 2.6-3.8                                                          | 2.3-3.6                                |
| <b>Refinement</b>                                   |                                       |                                                                  |                                                                  |                                        |
| Initial model used (PDB code)                       | 3LZ0, 1YTB                            | 3LZ0, 1NH2                                                       | 3LZ0, 1NH2                                                       | 3LZ0                                   |
| Model resolution (Å)                                | 3.3                                   | 2.9                                                              | 2.8                                                              | 2.6                                    |
| FSC threshold                                       | 0.5                                   | 0.5                                                              | 0.5                                                              | 0.5                                    |
| Map sharpening <i>B</i> factor (Å <sup>2</sup> )    | -67.51                                | -54.20                                                           | -49.14                                                           | -43.8                                  |
| Model composition                                   |                                       |                                                                  |                                                                  |                                        |
| Non-hydrogen atoms                                  | 13424                                 | 15099                                                            | 14215                                                            | 12019                                  |
| Protein residues                                    | 943                                   | 1144                                                             | 1159                                                             | 764                                    |
| Nucleotide residues                                 | 290                                   | 290                                                              | 244                                                              | 290                                    |
| <i>B</i> factors (Å <sup>2</sup> )                  |                                       |                                                                  |                                                                  |                                        |
| Protein                                             | 102.5                                 | 101.78                                                           | 97.11                                                            | 82.16                                  |
| Nucleic acid                                        | 124.23                                | 106.47                                                           | 104.20                                                           | 108.75                                 |
| R.m.s. deviations                                   |                                       |                                                                  |                                                                  |                                        |
| Bond lengths (Å)                                    | 0.005                                 | 0.007                                                            | 0.005                                                            | 0.005                                  |
| Bond angles (°)                                     | 0.854                                 | 0.836                                                            | 0.911                                                            | 0.856                                  |
| Validation                                          |                                       |                                                                  |                                                                  |                                        |
| MolProbity score                                    | 1.34                                  | 1.40                                                             | 1.26                                                             | 1.23                                   |
| Clashscore                                          | 4.44                                  | 5.05                                                             | 4.97                                                             | 4.52                                   |
| Poor rotamers (%)                                   | 0.89                                  | 0                                                                | 0.20                                                             | 0.16                                   |
| Ramachandran plot                                   |                                       |                                                                  |                                                                  |                                        |
| Favored (%)                                         | 97.41                                 | 97.31                                                            | 98.59                                                            | 98.13                                  |
| Allowed (%)                                         | 2.59                                  | 2.69                                                             | 1.41                                                             | 1.87                                   |
| Disallowed (%)                                      | 0                                     | 0                                                                | 0                                                                | 0                                      |

**Movie S1.** Overview of TBP-nucleosome structures. The video shows the conformation change of the DNA upon TBP binding and the movement of TBP upon TFIIA binding.
